# Supplementary material for: Influence of lattice dynamics on charge transport in the dianthra[2,3-b:2′,3′-f]-thieno[3,2-b]thiophene organic crystals from a theoretical study
Source: Royal Society of Chemistry journal article supplement (doi:10.1039/c2cp40857k), 2012-01-01
Supplement: c2cp40857k.pdf [file c2cp40857k.pdf]

## Supplementary Information:

### **Influence of lattice dynamics on charge transport in dianthra[2,3-b:2',3'-f]-thieno[3,2-b]thiophene organic crystal from a theoretical study**

Guangjun Nan <sup>\*a</sup>, Zesheng Li <sup>\*a,b,c</sup>

<sup>a</sup> Institute of Theoretical and Simulational Chemistry, Academy of Fundamental and Interdisciplinary Sciences, Harbin Institute of Technology, 150080 Harbin, People's Republic of China. \*E-mail: gjnan@hit.edu.cn; zeshengli@hit.edu.cn

<sup>b</sup> School of Chemistry, Beijing Institute of Technology, 100081 Beijing, People's Republic of China

<sup>c</sup> Key Laboratory of Cluster Science of Ministry of Education, Beijing Institute of Technology, 100081 Beijing, People's Republic of China

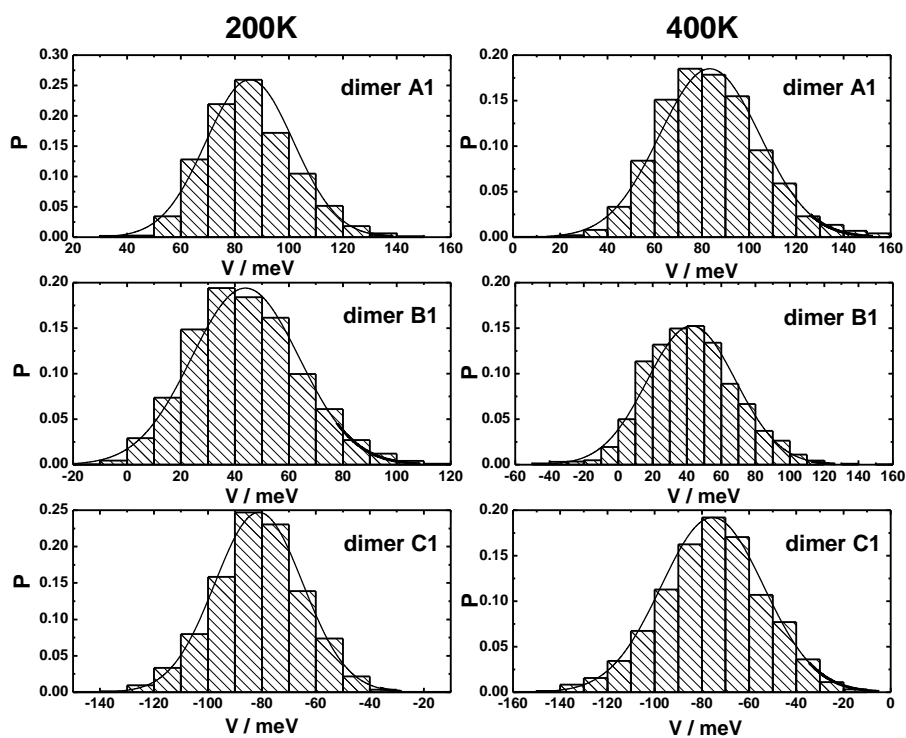

Figure S1. The normalized probability distributions of transfer integrals for nearest-neighboring dimers A1, B1 and C1 in the  $ab$  plane of DATT at 200K and 400K.

Table S1. The intermolecular distances ( $R_0$ ) and the transfer integrals ( $V_0$ ) with the equilibrium geometry at the COMPASS molecular mechanics level for the nearest-neighboring dimers of pentacene in Fig. 1(b).

| Dimers | $R_0$ (Å) | $V_0$ (meV) |
|--------|-----------|-------------|
| A1     | 6.239     | 35.6        |
| A2     | 6.239     | 35.5        |
| B1     | 4.689     | 90.8        |
| B2     | 4.689     | 90.8        |
| C1     | 5.160     | -51.7       |
| C2     | 5.160     | -51.7       |
